# Supplementary material
Source: PubMed Central journal article supplement (PMC4267335)
Supplement: pnas.201409552SI.pdf [file pnas.201409552SI.pdf]

# Supporting Information

Haudin et al. 10.1073/pnas.1409552111

## SI Text

### Geometrical Model: Alternative Derivation

**Intrinsic Equation.** We give here an alternative and equivalent derivation of the equation describing the curve generated by the geometrical model. This derivation is independent of the coordinate system and leads to a so-called natural (or intrinsic) equation giving the evolution of the local radius of curvature of the curve as a function of the arclength (ref. 1, p. 26).

We still consider the system at two infinitesimally close time steps such that the length of the curve has increased by an amount  $ds$  given by Eq. 1 of the main text, namely

$$ds = \theta_0 dr_b = \theta_0 \frac{dr_b}{dt} dt, \quad [\text{S1}]$$

where  $r_b(t)$  is the radius of the bubble of injected reagent at time  $t$  (Fig. S1A). The curve is parametrized by its arclength  $s$  such that the value of  $s$  of an arbitrary point  $P$  is equal to the length of the curve measured from the first point  $P_0$  to  $P$  (Fig. S1A). As explained in the main text,  $P_0$  is generated from an initial small circle of radius  $r_b(0) = r_c$ . The radius of curvature at  $s = 0$  is thus given by  $R(0) = r_c$ . At time  $t$ , the radius of curvature of the last point of the curve at its tail is given by

$$R(s) = r_b(t). \quad [\text{S2}]$$

Similarly, at time  $t + dt$ , the radius of curvature of the last point of the curve is given by

$$R(s + ds) = r_b(t + dt) = r_b(t) + \frac{dr_b}{dt} dt, \quad [\text{S3}]$$

where we used a first-order expansion in  $dt$ . Therefore, the difference between Eq. S3 and Eq. S2 leads to

$$R(s + ds) - R(s) = \frac{dR}{ds} ds = \frac{dr_b}{dt} dt, \quad [\text{S4}]$$

where we used a first-order expansion in  $ds$ . Using the expression S1 of  $ds$ , we obtain

$$\frac{dR}{ds} = \frac{1}{\theta_0}. \quad [\text{S5}]$$

Integration of this last equation leads to

$$R(s) = R(0) + \frac{s}{\theta_0} = r_c + \frac{s}{\theta_0}. \quad [\text{S6}]$$

The radius of curvature is thus a linear function of the arclength. This is the Cesàro equation of a logarithmic (equiangular) spiral (ref. 1, p. 26). Let us now obtain the equation of the curve in polar coordinates.

**Polar Equation.** We have thus obtained above the curvature  $\kappa$  as a function of the arclength  $s$ :

$$\kappa(s) = \frac{1}{R(s)} = \frac{\theta_0}{\theta_0 r_c + s}. \quad [\text{S7}]$$

The relation between the Cesàro equation and the Cartesian coordinates is (ref. 1, p. 26)

$$x(s) = \int \cos \bar{\kappa}(s) ds = \frac{\theta_0 r_c + s}{1 + \theta_0^2} (\cos \bar{\kappa}(s) + \theta_0 \sin \bar{\kappa}(s)), \quad [\text{S8a}]$$

$$y(s) = \int \sin \bar{\kappa}(s) ds = \frac{\theta_0 r_c + s}{1 + \theta_0^2} (\sin \bar{\kappa}(s) - \theta_0 \cos \bar{\kappa}(s)), \quad [\text{S8b}]$$

where

$$\bar{\kappa}(s) = \int \kappa(s) ds = \theta_0 \ln(\theta_0 r_c + s) + K, \quad [\text{S9}]$$

and  $K$  is a constant of integration which fixes the orientation of the curve in space and is fixed below. The constants of integration in Eq. S8 correspond to translations of the curve and are set to zero.

Using Eqs. S8 and S9, the polar equation is obtained as follows:

$$r(s) = \sqrt{x^2(s) + y^2(s)} = \frac{\theta_0 r_c + s}{\sqrt{1 + \theta_0^2}}, \quad [\text{S10}]$$

and

$$\begin{aligned} \theta(s) &= \arctan\left(\frac{y}{x}\right) = \arctan\left(\frac{\sin \bar{\kappa}(s) - \theta_0 \cos \bar{\kappa}(s)}{\cos \bar{\kappa}(s) + \theta_0 \sin \bar{\kappa}(s)}\right) \\ &= \arctan\left(\frac{\tan \bar{\kappa}(s) - \theta_0}{1 + \theta_0 \tan \bar{\kappa}(s)}\right) \\ &= \arctan[\tan(\bar{\kappa}(s) - \arctan \theta_0)] \\ &= \bar{\kappa}(s) - \arctan \theta_0 \\ &= \theta_0 \ln(\theta_0 r_c + s) + K - \arctan \theta_0. \end{aligned} \quad [\text{S11}]$$

Eliminating  $s$  between Eqs. S10 and S11, we have

$$r = \frac{e^{(\arctan \theta_0 - K)/\theta_0}}{\sqrt{1 + \theta_0^2}} e^{\theta/\theta_0}. \quad [\text{S12}]$$

The constant  $K$  can be fixed by imposing that  $s = 0$  corresponds to  $\theta = 0$ , meaning that the radius of curvature of the curve S12 at  $\theta = 0$  should be equal to  $r_c$ . This leads to  $K = \arctan \theta_0 - \theta_0 \ln(\theta_0 r_c)$  and Eq. S12 reduces to

$$r = \frac{r_c \theta_0}{\sqrt{1 + \theta_0^2}} e^{\theta/\theta_0} \equiv r_0 e^{\theta/\theta_0}. \quad [\text{S13}]$$

### Discrete Algorithm

The curves generated by the proposed mechanism and depicted schematically in Fig. S1A can also be directly constructed using the following discrete algorithm (Fig. S1B). We start from a circle of radius  $r_c$  with a point  $P_0$  at the top which represents the first point of the generated curve.

- i) The radius of the circle is increased by a given  $\Delta r$ . The ordinate of  $P_0$  is increased by  $\Delta r$  and then rotated by an angle  $\Delta\theta$ . A point  $P_1$  is added at the top of the circle and represents a new amount of precipitate.

ii) The radius of the circle is increased by a constant  $\Delta r$ . The ordinates of  $P_0$  and  $P_1$  are increased by  $\Delta r$  and then are both rotated by an angle  $\Delta\theta$ . A point  $P_2$  is added at the top of the circle.

The procedure is then iterated to generate the next points. The discrete angle used is provided by Eq. 3 of the main text:  $\Delta\theta = \theta_0 \Delta r / r$ . Fig. S1B shows the generation of the first few points using a large value of  $\Delta r$  for clarity. Fig. S1C shows the resulting structures emerging from the 2,000 and 4,000 iterations of the algorithm using a smaller value of  $\Delta r = 0.01$  and  $\theta_0 = 2$ . Fig. S1D shows that these two curves, once properly rotated and translated, are exactly described by Eq. S13 using the same value of  $\theta_0$  as the one used in the algorithm and a value of  $r_0$  such that the radius of curvature at  $P_0$  is equal to the radius  $r_c$  of the initial small circle, namely  $r_0 = r_c \theta_0 / (1 + \theta_0^2)^{1/2}$ .

### Spiral Analysis

Each experiment is recorded by taking photos at regular time steps adapted according to the injection rate. Typically the time interval between two photos is 1 s for the injection rates used. The pattern is then analyzed at one given time for each experiment when the spirals are sufficiently developed and/or when the overall pattern is as large as the field of view. To analyze the spirals observed in our experiments, we measure the evolution of the spiral radii  $r$  as a function of the polar angle  $\theta$ . By convention, the starting point  $P_0$  of the spiral, which is the closest to the spiral center, is characterized by  $\theta = 0$  and  $r = r_0$  (Fig. S2). However, the exact position of the spiral center  $C_S$ , from which the radii should ideally be measured, is not known. In this section, we explain the method used to overcome this difficulty.

**System of Coordinates Centered on the Spiral Center.** The equation of a logarithmic spiral written in a system of coordinates centered on the spiral center  $C_S$  is given by

$$r = r_0 e^{\theta/\theta_0}, \quad [\text{S14}]$$

where  $r_0$  and  $\theta_0$  are constant parameters. If the spiral radii  $r$  are measured from the exact position of the spiral center  $C_S$ , then the evolution of  $r$  as a function of the polar angle  $\theta$  can be fitted using Eq. S14. The measured spiral radii and the polar angle can then be rescaled by  $r_0$  and  $\theta_0$ , respectively, to produce the graph displayed in Fig. 3B of the main text.

**Arbitrary System of Coordinates.** The exact position of the spiral center is generally not known a priori and the radii are measured in an arbitrary system of coordinates whose origin does not coincide with  $C_S$ . In such a system of coordinates centered on, say,  $C_A$ , the expression of a logarithmic spiral is no longer given by the simple form Eq. S14. In this section, we derive the general expression describing a logarithmic spiral off centered with regard to  $C_S$  which is used to fit the data.

The approximate position of the spiral center  $C_A$  used to measure the spiral radii is obtained from the osculating circle passing through  $P_0$ . Fig. S2A shows this construction on an exact logarithmic spiral to illustrate and test the proposed procedure. Fig. S2B shows the evolution of the spiral radii  $r$  as a function of the polar angle  $\theta$  when the radii are measured from the exact ( $C_S$ ) and approximate ( $C_A$ ) positions of the spiral center, respectively. The polar coordinates of the spiral obtained from the approximate position of the center are noted  $(r', \theta')$ , whereas the polar coordinates of the spiral obtained from the exact position of the center are noted  $(r, \theta)$ .

These two curves are obviously equivalent and describe the same spiral. As shown in Fig. S3, they are just measured in two different systems of coordinates related by a rotation and a translation as

$$\begin{pmatrix} x \\ y \end{pmatrix} = \begin{pmatrix} \cos \varphi & -\sin \varphi \\ \sin \varphi & \cos \varphi \end{pmatrix} \begin{pmatrix} x' \\ y' \end{pmatrix} - \begin{pmatrix} x_0 \\ y_0 \end{pmatrix}, \quad [\text{S15}]$$

with

$$\varphi = \arcsin\left(\frac{y_0}{r_0}\right), \quad x' = r' \cos \theta', \quad y' = r' \sin \theta'. \quad [\text{S16}]$$

$x_0$  and  $y_0$  are the Cartesian coordinates of  $C_A$  in the  $(x, y)$  system of coordinates whose origin coincides with the spiral center  $C_S$ . Because  $r'$ ,  $\theta'$ , and  $r_0'$  are the quantities measured in practice, the curve  $(r, \theta)$  obtained from the exact position of the center can thus be reconstructed once  $x_0$  and  $y_0$  are known by using

$$r = \sqrt{x^2 + y^2}, \quad \theta = \arccos\left(\frac{x}{r}\right). \quad [\text{S17}]$$

Notice that if the spiral is exactly logarithmic and if the approximate center is constructed using the osculating circle passing through  $P_0$ , then  $x_0 = 0$  as seen in Fig. S2A. In practice, the spirals are obviously never exactly logarithmic and the position of the osculating circle is never perfect. Consequently, one needs to allow for a nonvanishing value for  $x_0$  in the procedure. We show below how  $x_0$  and  $y_0$  can be obtained.

The spiral parameters  $r_0$  and  $\theta_0$ , together with the translation parameters of the center  $x_0$  and  $y_0$ , are obtained all at once by fitting the data by the general expression of a logarithmic spiral valid in an arbitrary system of coordinates. This general expression is simply obtained by considering the reverse of the transformation S15:

$$\begin{pmatrix} x' \\ y' \end{pmatrix} = \begin{pmatrix} \cos \varphi & \sin \varphi \\ -\sin \varphi & \cos \varphi \end{pmatrix} \begin{pmatrix} x + x_0 \\ y + y_0 \end{pmatrix}, \quad [\text{S18}]$$

with

$$x = r_0 e^{t/\theta_0} \cos t, \quad y = r_0 e^{t/\theta_0} \sin t, \quad [\text{S19}]$$

and  $\varphi$  is given by Eq. S16. The parametric equations, where  $t$  is the parameter describing a logarithmic spiral in an arbitrary system of coordinates, are finally given by

$$r'(r_0, \theta_0, x_0, y_0; t) = \sqrt{x'^2 + y'^2}, \quad [\text{S20a}]$$

$$\theta'(r_0, \theta_0, x_0, y_0; t) = \arccos\left(\frac{x'}{r'}\right). \quad [\text{S20b}]$$

The values of the parameters  $r_0$ ,  $\theta_0$ ,  $x_0$ , and  $y_0$  are obtained for each spiral by fitting the expression S20 to the measured values of  $r'$  and  $\theta'$  using a nonlinear regression procedure (Mathematica).

At this stage, because  $x_0$  and  $y_0$  are known, we apply the transformation S15 to the data to obtain the measured curve in a system of coordinates centered on the spiral center. The result is shown in Fig. S2B with a very good agreement compared with the measurements performed directly in a system of coordinates centered on the spiral center. This illustrates the correctness of the procedure proposed to treat the data.

### Results from the Analysis

The results of the analysis described in the previous section are gathered in Fig. 3B of the main text where the radial distance and the polar angle are rescaled by  $r_0$  and  $\theta_0$ . The same results are presented here separately for each categories  $S_i$  defined in Fig. 1 of the main text. The spirals are logarithmic in good approximation in each of the seven sectors  $S_i$  of the phase diagram (Fig. S4 below).

Only the sector  $S_1$  displays more dispersion for low values of  $\theta/\theta_0$  but, at larger values of the rescaled polar angle, the spirals follow closely the evolution of a logarithmic spiral. For information, we also show in Fig. S4H the results obtained for the inverted case, where sodium silicate is injected into cobalt chloride, corresponding to the sectors  $S_1$  and  $S_3$ . Those spirals are also logarithmic.

In Fig. S5, we show the distributions of the values of  $r_0$  and  $\theta_0$  characterizing all of the analyzed spirals. Those distributions show also the contributions of each sector  $S_i$ . Notice that those distributions have a meaning only if  $r_0$  and  $\theta_0$  are both independent of the reagent concentrations (or if the dependence is weak). It seems that this is roughly the case by inspecting the contributions of each sector  $S_i$ . However, the number of analyzed spirals per sector is not large enough to draw definitive conclusions. Notice that the sector  $S_2$  is characterized by larger values of  $r_0$  ( $r_0 \gtrsim 0.5$  mm). However, only seven spirals have been analyzed for this sector. For clarity, those data are not reported in Fig. S5A. The distributions of  $r_0$  and  $\theta_0$  are both rather well fitted by a log-normal distribution

$$f(x; \mu, s) = \frac{\lambda}{x} e^{-[(\ln x - \mu)^2 / 2s^2]}. \quad [\text{S21}]$$

The expectation value  $E$  is then given by

$$E = e^{\mu + s^2/2}, \quad [\text{S22}]$$

and the SD  $\sigma$  is

$$\sigma = (e^{s^2} - 1)^{1/2} E. \quad [\text{S23}]$$

We find

$$r_0 = (0.43 \pm 0.20) \text{ mm}, \quad \theta_0 = 1.67 \pm 0.52. \quad [\text{S24}]$$

Within our minimal geometric model, the radius of curvature of the spiral at its starting point  $P_0$  should be close to the radius  $r_c$  of the initial circle of solid precipitate before the solid layer breaks. The radius of curvature  $R$  of a logarithmic spiral is given by

$$R = r_0 e^{\theta/\theta_0} \frac{\sqrt{1 + \theta_0^2}}{\theta_0}. \quad [\text{S25}]$$

Consequently, at the point  $P_0$  ( $\theta=0$ ), the radius of curvature  $R_{P_0} \equiv r_c$  is given by

$$r_c = r_0 \frac{\sqrt{1 + \theta_0^2}}{\theta_0}. \quad [\text{S26}]$$

The distribution of  $r_c$  in the experiments is displayed in Fig. S6A and also follows a log-normal distribution. We find

$$r_c = (0.51 \pm 0.24) \text{ mm}. \quad [\text{S27}]$$

Three typical spirals constructed by considering a constant value of  $r_c$  equal to its expectation value and  $\theta_0$  varying by 1 SD around its expectation value are shown in Fig. S6B. Those three spirals are generated from the same expanding bubble of reagent having a radius equal to  $40 r_c$ . Consequently, they all have the same pair of radii of curvature at their end points. An animation showing the growth of these spirals can be found in [Movie S2](#). [Movie S3](#) shows a qualitative comparison between the growth a spiral observed experimentally and a spiral obtained from the geometrical model.

Finally, Fig. S7 shows the distribution of the maximal value  $\theta_{\max}$  of the polar angle characterizing each analyzed spiral. As explained in the main text, we choose  $\theta_{\max} > 2.44$  ( $140^\circ$ ) such that the maximal value of  $\theta/\theta_0$  for each spiral is large enough to obtain a relevant comparison with the model.

1. Struik DJ (1988) *Lectures on Classical Differential Geometry* (Dover Publications, New York), 2nd Ed.

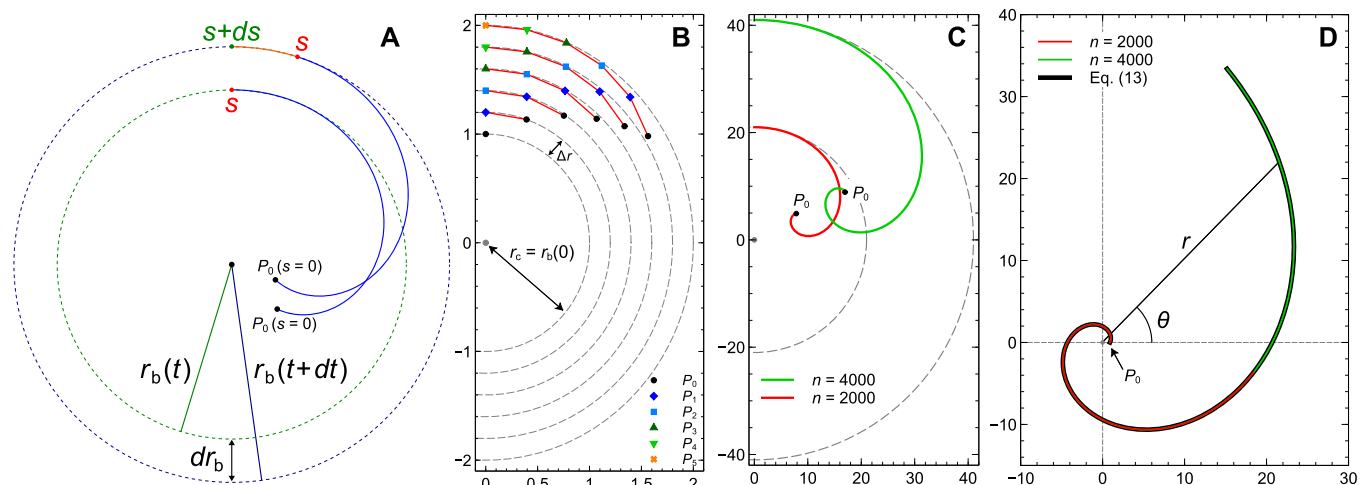

**Fig. S1.** (A) Schematic of the growth mechanism of the curly shaped precipitates during an infinitesimal interval of time. (B) First few points generated by this mechanism and obtained from a discrete algorithm using  $\Delta r = 0.2$ ,  $\theta_0 = 2$ , and  $r_c = 1$ . The red straight lines are added to help with visualizing the emerging structure. Due to symmetry, the generation of only one curve is shown. (C) Curves generated from a discrete algorithm using  $\Delta r = 0.01$ ,  $\theta_0 = 2$ , and  $r_c = 1$ . The curves obtained after  $n = 2,000$  and  $n = 4,000$  iterations are shown and correspond to a bubble of injected reagent having a radius of  $21r_c$  and  $41r_c$ , respectively ( $n\Delta r + r_c$ ). (D) If the emerging curves are logarithmic spirals, the position of the spiral center can be deduced from the position of the center of curvature of  $P_0$  (see *Spiral Analysis*). In the context of this algorithm, the position of the center of curvature of  $P_0$  is tracked during the growth process. The total angle of rotation of the curves during the growth is simply equal to the sum of all  $\Delta\theta$  applied. Therefore, these two curves can be properly rotated and translated such that their centers coincide with the origin of coordinates. These curves are exactly described by Eq. S13 with  $\theta_0 = 2$  and  $r_0 = r_c\theta_0/(1 + \theta_0^2)^{1/2} \approx 0.89$ , such as its radius of curvature at  $P_0$  ( $\theta = 0$ ) is equal to  $r_c$ .

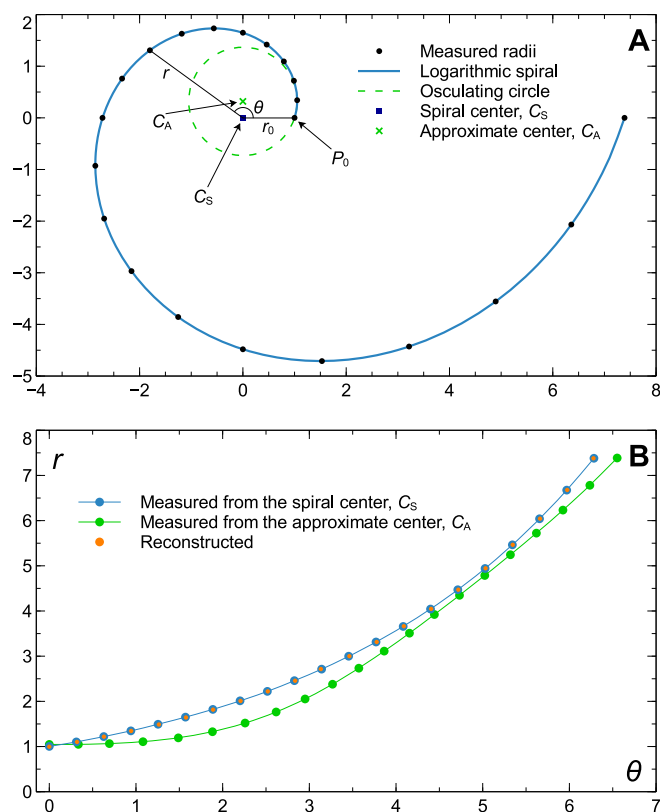

**Fig. S2.** (A) Logarithmic spiral together with the osculating circle passing through the point  $P_0$  which is the closest to the spiral center. The center of the osculating circle  $C_A$  is used as approximate center to measure the spiral radii. The black dots show where the radii are measured.  $C_S$  indicates the position of the spiral center. (B) Plot of the radius  $r$  of the spiral as a function of the polar angle  $\theta$  using the exact and the approximate positions of the spiral center. The curve reconstructed from the data obtained with the approximate position of the spiral center is also shown (orange dots) and agrees well with the spiral curve measured directly from the exact center position  $C_S$ .



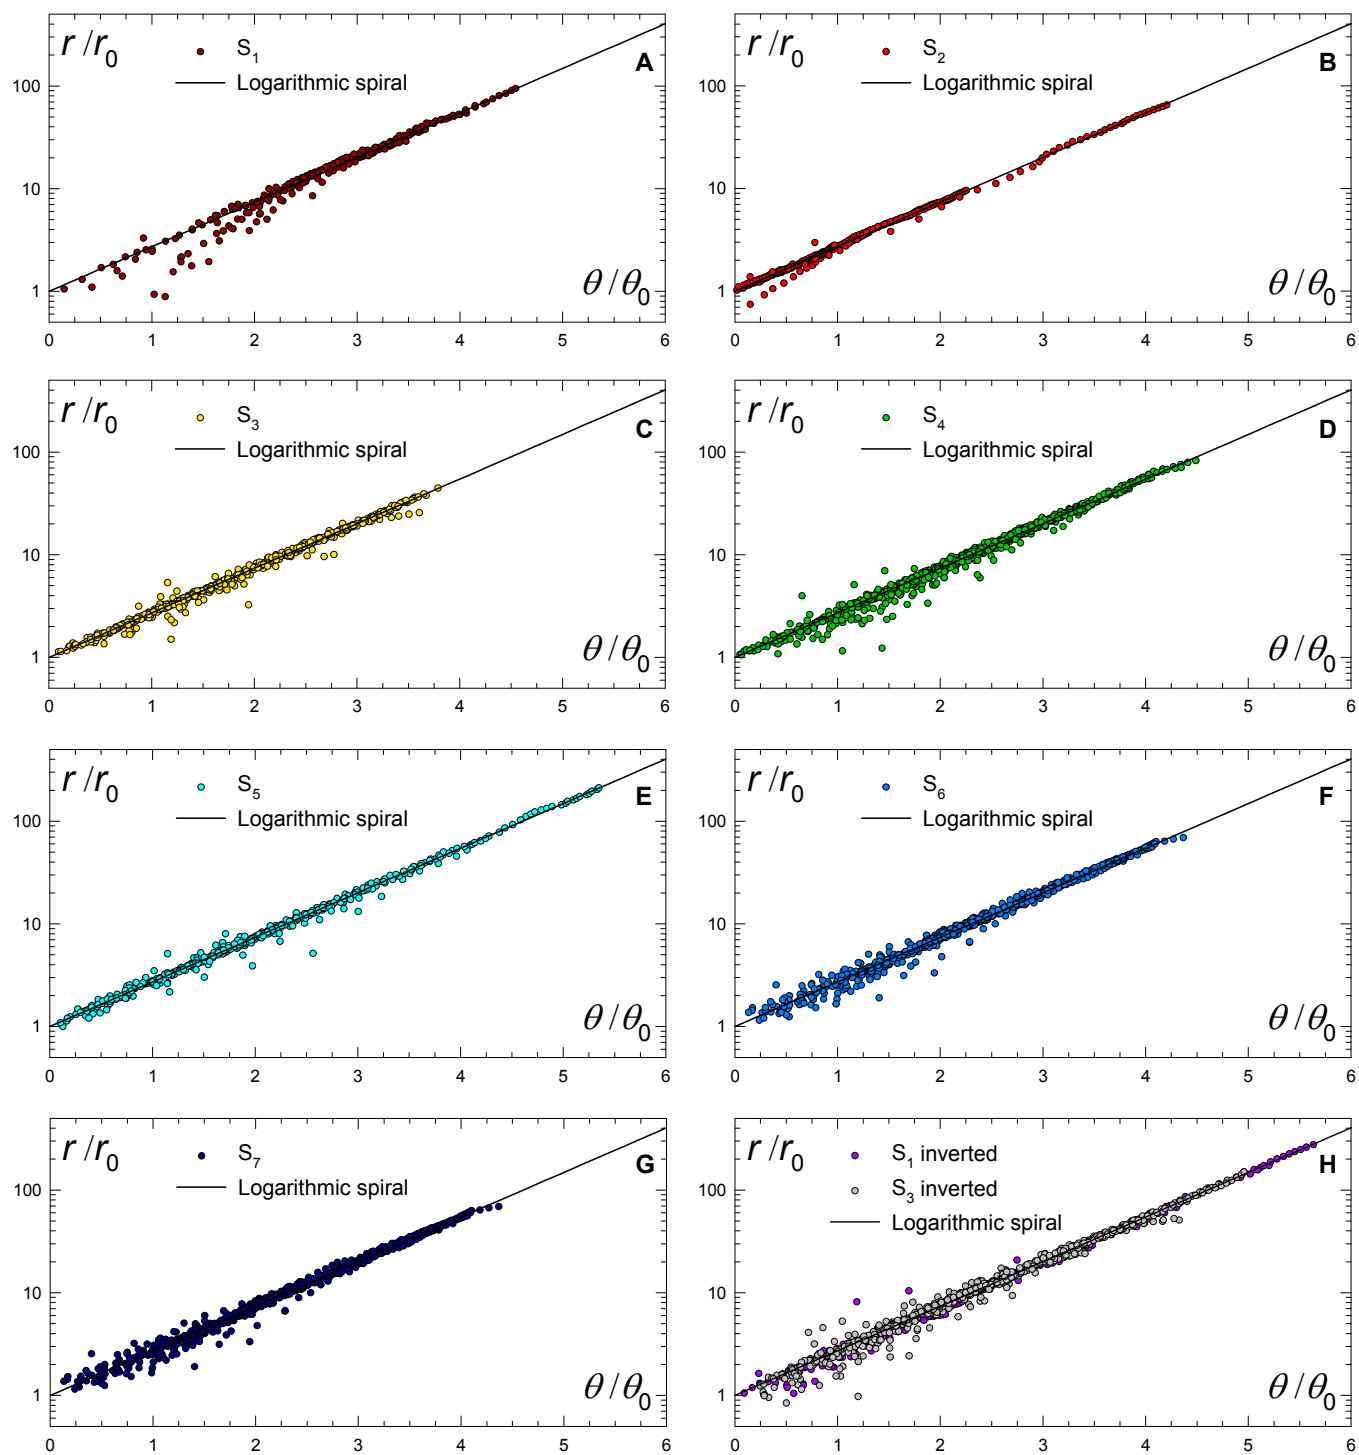

**Fig. S4.** (A–G) Evolution of the rescaled spiral radii  $r/r_0$  as a function of the rescaled polar angle  $\theta/\theta_0$  for each category  $S_j$  identified in Fig. 1 of the main text. (H) Evolution of the rescaled spiral radii  $r/r_0$  as a function of the rescaled polar angle  $\theta/\theta_0$  for the inverted case, where sodium silicate is injected into cobalt chloride, corresponding to the sectors  $S_1$  and  $S_3$ .



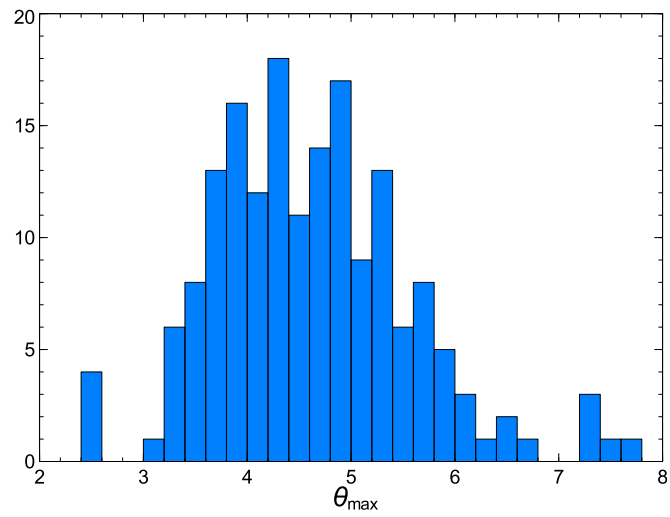

**Fig. S7.** Distribution of  $\theta_{\max}$  defined as the maximal value of the polar angle of the analyzed spiral segments.

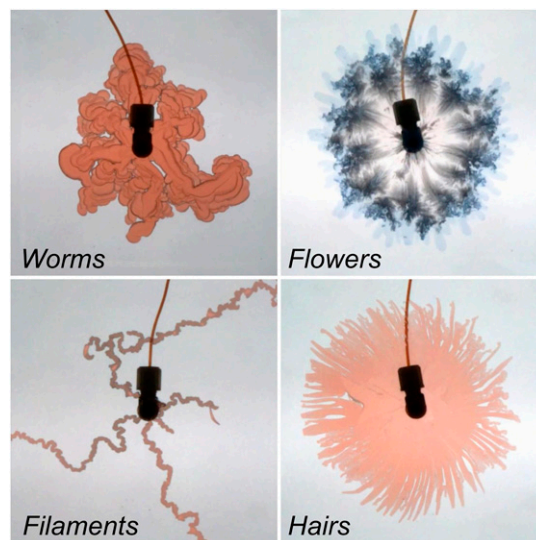

**Movie S1.** Some examples of chemical gardens growing in a confined geometry upon injecting one solution of cobalt chloride into sodium silicate.

[Movie S1](#)



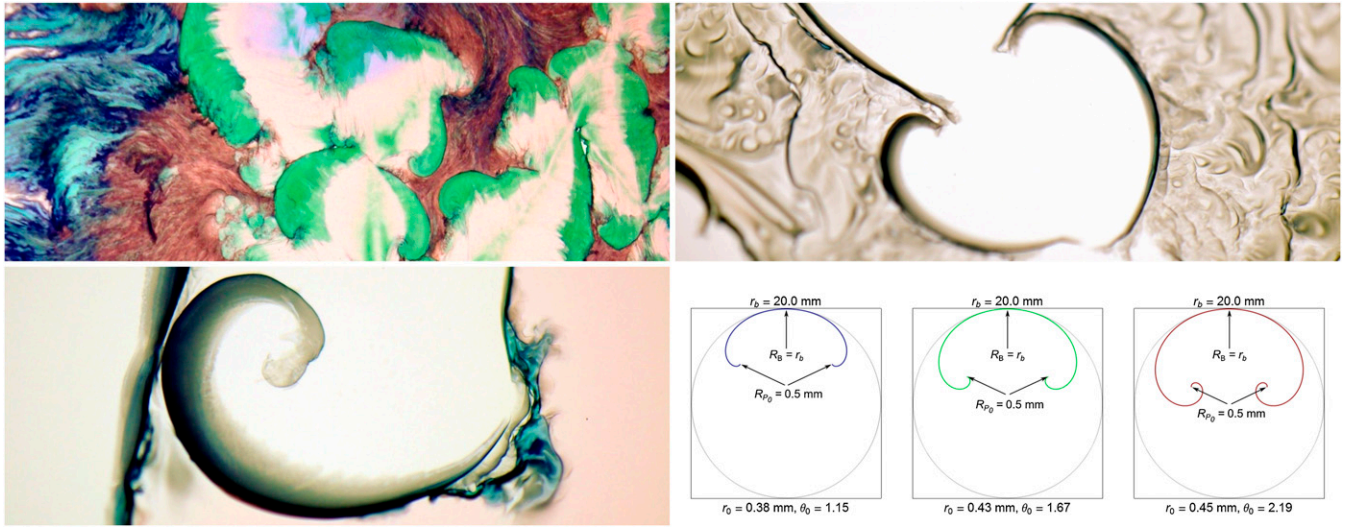

**Movie S2.** Photos of spiraling precipitates and animation of the spiral growth according to the geometrical model.

[Movie S2](#)

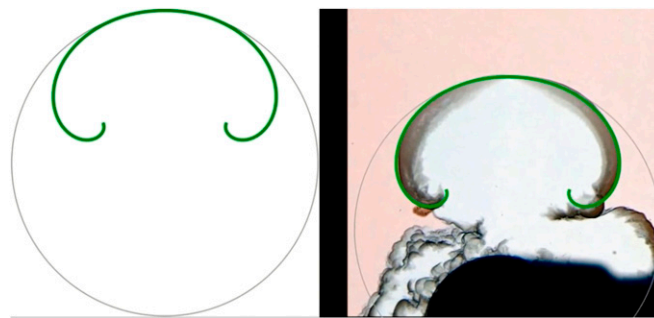

**Movie S3.** Qualitative comparison between the spiral growth observed in experiments and the one obtained from the geometrical model.

[Movie S3](#)
